# Supplementary material for: Food Insecurity and Socioeconomic Disadvantage in Australia
Source: PubMed Central journal article supplement (PMC7014009; doi:10.3390/ijerph17020559), 2020-01-15
Supplement: ijerph-17-00559-s001.pdf [file ijerph-17-00559-s001.pdf]

**Table S1.** Pearson Chi-Square Tests of differences in categorical food security among adults by demographic characteristics.

|                                      |                                                       | High food security among adults | Marginal food security among adults | Low food security among adults | Very low food security among adults | Pearson Chi-Square                                               |
|--------------------------------------|-------------------------------------------------------|---------------------------------|-------------------------------------|--------------------------------|-------------------------------------|------------------------------------------------------------------|
| <b>Sex</b>                           | Male <i>n</i> (%)                                     | 13 (10.7)                       | 5 (4.1)                             | 20 (16.5)                      | 83 (68.6)                           | $\chi^2$ (3, N = 398 <sup>1</sup> ) = 6.462, <i>p</i> > 0.05     |
|                                      | Female <i>n</i> (%)                                   | 28 (10.1)                       | 31 (11.2)                           | 55 (19.9)                      | 163 (58.8)                          |                                                                  |
| Aboriginal or Torres Strait Islander | Yes <i>n</i> (%)                                      | 11 (8.3)                        | 11 (8.3)                            | 29 (21.8)                      | 82 (61.7)                           | $\chi^2$ (3, N = 400) = 1.875, <i>p</i> > 0.05                   |
|                                      | No <i>n</i> (%)                                       | 30 (11.2)                       | 25 (9.4)                            | 46 (17.2)                      | 166 (62.3)                          |                                                                  |
| Marital status                       | Married or defacto <i>n</i> (%)                       | 3 (5.7)                         | 7 (13.5)                            | 14 (26.9)                      | 28 (53.8)                           | $\chi^2$ (3, N = 400) = 5.263, <i>p</i> > 0.05                   |
|                                      | Single <i>n</i> (%)                                   | 38 (10.9)                       | 29 (8.3)                            | 61 (17.5)                      | 220 (63.2)                          |                                                                  |
| Household composition                | Single adult <i>n</i> (%)                             | 13 (12.0)                       | 6 (5.5)                             | 20 (18.5)                      | 69 (63.9)                           | $\chi^2$ (9, N = 388 <sup>2</sup> ) = 10.336, <i>p</i> > 0.05    |
|                                      | Two or more adults, no children <i>n</i> (%)          | 4 (5.3)                         | 5 (6.6)                             | 12 (15.8)                      | 55 (72.4)                           |                                                                  |
|                                      | Single adult, one or more children <i>n</i> (%)       | 10 (9.5)                        | 13 (12.4)                           | 19 (18.1)                      | 63 (60.0)                           |                                                                  |
|                                      | Two or more adults, one or more children <i>n</i> (%) | 12 (12.1)                       | 11 (11.1)                           | 23 (23.2)                      | 53 (53.5)                           |                                                                  |
| Educational attainment               | Completed high school <i>n</i> (%)                    | 23 (10.1)                       | 21 (9.3)                            | 53 (23.3)                      | 130 (57.3)                          | $\chi^2$ (3, N = 400) = <b>7.857, <i>p</i> &lt; 0.05, V=.140</b> |
|                                      | Did not complete high school <i>n</i> (%)             | 18 (10.4)                       | 15 (8.7)                            | 22 (12.7)                      | 118 (68.2)                          |                                                                  |
| Labor force status                   | Employed <i>n</i> (%)                                 | 7 (13.5)                        | 5 (9.6)                             | 16 (30.8)                      | 24 (46.2)                           | $\chi^2$ (6, N = 400) = 11.267, <i>p</i> > 0.05                  |
|                                      | Unemployed <i>n</i> (%)                               | 4 (5.5)                         | 4 (5.5)                             | 12 (16.7)                      | 52 (72.2)                           |                                                                  |
|                                      | Not in labor force <i>n</i> (%)                       | 30 (10.9)                       | 27 (9.8)                            | 47 (17.0)                      | 172 (62.3)                          |                                                                  |
| Welfare dependent                    | Yes <i>n</i> (%)                                      | 32 (10.6)                       | 28 (9.3)                            | 50 (16.6)                      | 191 (63.5)                          | $\chi^2$ (3, N = 400) = 3.678, <i>p</i> > 0.05                   |
|                                      | No <i>n</i> (%)                                       | 9 (9.0)                         | 8 (8.1)                             | 25 (25.3)                      | 57 (57.6)                           |                                                                  |

<sup>1</sup> Excludes 'other' sex category, <sup>2</sup> Excludes participants with missing data for this variable. Significant results are indicated with bold text.

**Table S2.** Pearson Chi-Square Tests of differences in binary food security among adults by demographic characteristics.

|                                                   |                    | Food security among adults | Food insecurity among adults | Pearson Chi-Square                                           |
|---------------------------------------------------|--------------------|----------------------------|------------------------------|--------------------------------------------------------------|
| <b>Sex <i>n</i> (%)</b>                           | Male               | 18 (14.9)                  | 103 (85.1)                   | $\chi^2$ (1, N = 398 <sup>1</sup> ) = 2.227, <i>p</i> > 0.05 |
|                                                   | Female             | 59 (21.3)                  | 218 (78.7)                   |                                                              |
| Aboriginal or Torres Strait Islander <i>n</i> (%) | Yes                | 22 (16.5)                  | 111 (83.5)                   | $\chi^2$ (1, N = 400) = .940, <i>p</i> > 0.05                |
|                                                   | No                 | 55 (20.6)                  | 212 (79.4)                   |                                                              |
| Marital status <i>n</i> (%)                       | Married or defacto | 10 (19.2)                  | 42 (80.8)                    |                                                              |

|                                        |                                          |           |            |                                           |
|----------------------------------------|------------------------------------------|-----------|------------|-------------------------------------------|
|                                        | Single                                   | 67 (19.3) | 281 (80.8) | $\chi^2 (1, N = 400) = .000, p > 0.05$    |
| Household composition<br><i>n</i> (%)  | Single adult                             | 19 (17.6) | 89 (82.4)  | $\chi^2 (1, N = 388^2) = 4.383, p > 0.05$ |
|                                        | Two or more adults, no children          | 9 (11.8)  | 67 (88.2)  |                                           |
|                                        | Single adult, one or more children       | 23 (21.9) | 82 (88.1)  |                                           |
|                                        | Two or more adults, one or more children | 23 (23.2) | 76 (76.8)  |                                           |
| Educational attainment<br><i>n</i> (%) | Completed high school                    | 44 (19.4) | 183 (80.6) | $\chi^2 (1, N = 400) = .006, p > 0.05$    |
|                                        | Did not complete high school             | 33 (19.1) | 140 (80.9) |                                           |
| Labor force status <i>n</i> (%)        | Employed                                 | 12 (23.1) | 40 (76.9)  | $\chi^2 (2, N = 400) = 3.907, p > 0.05$   |
|                                        | Unemployed                               | 8 (11.1)  | 64 (88.9)  |                                           |
|                                        | Not in labor force                       | 57 (20.7) | 219 (79.3) |                                           |
| Welfare dependent <i>n</i> (%)         | Yes                                      | 60 (19.9) | 241 (80.1) | $\chi^2 (1, N = 400) = .366, p > 0.05$    |
|                                        | No                                       | 17 (17.2) | 82 (82.8)  |                                           |

<sup>1</sup> Excludes 'other' sex category, <sup>2</sup> Excludes participants with missing data for this variable. Significant results are indicated with bold text

**Table S3.** Pearson Chi-Square Tests of differences in categorical food security among children by demographic characteristics.

|                                      |                                                       | High or marginal food security among children | Low food security among children | Very low food security among children | Pearson Chi-Square                        |
|--------------------------------------|-------------------------------------------------------|-----------------------------------------------|----------------------------------|---------------------------------------|-------------------------------------------|
| Sex                                  | Male <i>n</i> (%)                                     | 13 (44.8)                                     | 15 (51.7)                        | 1 (3.4)                               | $\chi^2 (2, N = 216) = 1.994, p > 0.05$   |
|                                      | Female <i>n</i> (%)                                   | 77 (41.2)                                     | 87 (46.5)                        | 23 (12.3)                             |                                           |
| Aboriginal or Torres Strait Islander | Yes <i>n</i> (%)                                      | 34 (45.3)                                     | 32 (42.7)                        | 9 (12.0)                              | $\chi^2 (2, N = 216) = .957, p > 0.05$    |
|                                      | No <i>n</i> (%)                                       | 56 (39.7)                                     | 70 (49.6)                        | 15 (10.6)                             |                                           |
| Marital status                       | Married or defacto <i>n</i> (%)                       | 17 (48.6)                                     | 16 (45.7)                        | 2 (5.7)                               | $\chi^2 (2, N = 216) = 1.593, p > 0.05$   |
|                                      | Single <i>n</i> (%)                                   | 73 (40.3)                                     | 86 (47.5)                        | 22 (12.2)                             |                                           |
| Household composition                | Single adult <i>n</i> (%)                             | 2 (66.6)                                      | 1 (33.3)                         | 0 (0.0)                               | $\chi^2 (6, N = 215^1) = 1.593, p > 0.05$ |
|                                      | Two or more adults, no children <i>n</i> (%)          | 2 (20.0)                                      | 4 (40.0)                         | 4 (40.0)                              |                                           |
|                                      | Single adult, one or more children <i>n</i> (%)       | 45 (43.3)                                     | 49 (47.1)                        | 10 (9.6)                              |                                           |
|                                      | Two or more adults, one or more children <i>n</i> (%) | 41 (41.8)                                     | 47 (48.0)                        | 10 (10.2)                             |                                           |
| Educational attainment               | Completed high school <i>n</i> (%)                    | 48 (36.9)                                     | 67 (51.5)                        | 15 (11.5)                             | $\chi^2 (2, N = 216) = 3.105, p > 0.05$   |
|                                      | Did not complete high school <i>n</i> (%)             | 42 (48.8)                                     | 35 (40.7)                        | 9 (10.5)                              |                                           |
| Labor force status                   | Employed <i>n</i> (%)                                 | 13 (37.1)                                     | 19 (54.3)                        | 3 (8.6)                               | $\chi^2 (4, N = 216) = 3.802, p > 0.05$   |
|                                      | Unemployed <i>n</i> (%)                               | 4 (23.5)                                      | 10 (58.8)                        | 3 (17.6)                              |                                           |
|                                      | Not in labor force <i>n</i> (%)                       | 73 (44.5)                                     | 73 (44.5)                        | 18 (11.0)                             |                                           |
|                                      | Yes <i>n</i> (%)                                      | 74 (45.7)                                     | 69 (42.6)                        | 19 (11.7)                             |                                           |

|                   |                 |           |           |         |                                         |
|-------------------|-----------------|-----------|-----------|---------|-----------------------------------------|
| Welfare dependent | No <i>n</i> (%) | 16 (29.6) | 33 (61.1) | 5 (9.3) | $\chi^2 (2, N = 216) = 5.667, p > 0.05$ |
|-------------------|-----------------|-----------|-----------|---------|-----------------------------------------|

<sup>1</sup> Excludes participants with missing data for this variable.

**Table S4.** Pearson Chi-Square Tests of differences in binary food security among children by demographic characteristics.

|                                                   |                                          | Food security among children | Food insecurity among children | Pearson Chi-Square                                       |
|---------------------------------------------------|------------------------------------------|------------------------------|--------------------------------|----------------------------------------------------------|
| <b>Sex <i>n</i> (%)</b>                           | Male                                     | 13 (44.8)                    | 16 (55.2)                      | $\chi^2 (1, N = 216) = .138, p > 0.05$                   |
|                                                   | Female                                   | 77 (41.2)                    | 110 (58.8)                     |                                                          |
| Aboriginal or Torres Strait Islander <i>n</i> (%) | Yes                                      | 34 (45.3)                    | 41 (54.7)                      | $\chi^2 (1, N = 216) = .636, p > 0.05$                   |
|                                                   | No                                       | 56 (39.7)                    | 85 (60.3)                      |                                                          |
| Marital status <i>n</i> (%)                       | Married or defacto                       | 17 (48.6)                    | 18 (51.4)                      | $\chi^2 (2, N = 216) = .819, p > 0.05$                   |
|                                                   | Single                                   | 73 (40.3)                    | 108 (59.7)                     |                                                          |
| Household composition <i>n</i> (%)                | Single adult                             | 2 (66.6)                     | 1 (33.3)                       | $\chi^2 (3, N = 215^1) = 2.807, p > 0.05$                |
|                                                   | Two or more adults, no children          | 2 (20.0)                     | 8 (80.0)                       |                                                          |
|                                                   | Single adult, one or more children       | 45 (43.3)                    | 59 (56.7)                      |                                                          |
|                                                   | Two or more adults, one or more children | 41 (41.8)                    | 57 (58.2)                      |                                                          |
| Educational attainment <i>n</i> (%)               | Completed high school                    | 48 (36.9)                    | 82 (63.1)                      | $\chi^2 (1, N = 216) = 3.023, p > 0.05$                  |
|                                                   | Did not complete high school             | 42 (48.8)                    | 44 (51.1)                      |                                                          |
| Labor force status <i>n</i> (%)                   | Employed                                 | 13 (23.6)                    | 22 (76.4)                      | $\chi^2 (2, N = 216) = 3.142, p > 0.05$                  |
|                                                   | Unemployed                               | 4 (23.5)                     | 13 (76.5)                      |                                                          |
|                                                   | Not in labor force                       | 73 (44.5)                    | 91 (55.5)                      |                                                          |
| Welfare dependent <i>n</i> (%)                    | Yes                                      | 74 (45.7)                    | 88 (54.3)                      | $\chi^2 (1, N = 216) = 4.292, p < 0.05$<br><b>V=.141</b> |
|                                                   | No                                       | 16 (29.6)                    | 38 (70.4)                      |                                                          |

<sup>1</sup> Excludes participants with missing data for this variable. Significant results are indicated with bold text

**Table S5.** Pearson Chi-Square Tests of differences in categorical household food security by demographic characteristics.

|                                      |                                 | High household food security | Marginal household food security | Low household food security | Very low household food security | Pearson Chi-Square                                  |
|--------------------------------------|---------------------------------|------------------------------|----------------------------------|-----------------------------|----------------------------------|-----------------------------------------------------|
| <b>Sex</b>                           | Male <i>n</i> (%)               | 13 (10.7)                    | 5 (4.1)                          | 21 (17.4)                   | 82 (67.8)                        | $\chi^2 (3, N = 398^1) = 9.838, p < 0.05, V = .157$ |
|                                      | Female <i>n</i> (%)             | 22 (7.9)                     | 29 (10.5)                        | 73 (26.4)                   | 153 (55.2)                       |                                                     |
| Aboriginal or Torres Strait Islander | Yes <i>n</i> (%)                | 10 (7.5)                     | 10 (7.5)                         | 33 (24.8)                   | 80 (60.2)                        | $\chi^2 (3, N = 400) = .744, p > 0.05$              |
|                                      | No <i>n</i> (%)                 | 25 (9.3)                     | 24 (9.0)                         | 61 (22.8)                   | 157 (58.8)                       |                                                     |
| Marital status                       | Married or defacto <i>n</i> (%) | 2 (3.8)                      | 6 (11.5)                         | 22 (42.3)                   | 22 (42.3)                        | $\chi^2 (3, N = 400) = 14.184, p < 0.05, V = .188$  |
|                                      | Single <i>n</i> (%)             | 33 (9.5)                     | 28 (8.0)                         | 72 (20.7)                   | 215 (61.8)                       |                                                     |
| Household composition                | Single adult <i>n</i> (%)       | 13 (12.0)                    | 6 (5.5)                          | 20 (18.5)                   | 69 (63.9)                        | $\chi^2 (3, N = 388^2) =$                           |

|                        |                                                       |           |           |           |            |                                                       |
|------------------------|-------------------------------------------------------|-----------|-----------|-----------|------------|-------------------------------------------------------|
|                        | Two or more adults, no children <i>n</i> (%)          | 4 (5.3)   | 5 (6.6)   | 12 (15.8) | 55 (72.4)  | 10.336, <i>p</i> > 0.05                               |
|                        | Single adult, one or more children <i>n</i> (%)       | 10 (9.5)  | 13 (12.4) | 19 (18.1) | 63 (60.0)  |                                                       |
|                        | Two or more adults, one or more children <i>n</i> (%) | 12 (12.1) | 11 (11.1) | 23 (23.2) | 53 (53.5)  |                                                       |
| Educational attainment | Completed high school <i>n</i> (%)                    | 20 (8.8)  | 17 (7.5)  | 63 (27.8) | 127 (55.9) | $\chi^2$ (3, <i>N</i> = 400) = 5.640 <i>p</i> > 0.05  |
|                        | Did not complete high school <i>n</i> (%)             | 15 (8.7)  | 17 (9.8)  | 31 (17.9) | 110 (63.6) |                                                       |
| Labor force status     | Employed <i>n</i> (%)                                 | 6 (11.5)  | 4 (7.7)   | 19 (36.3) | 23 (44.2)  | $\chi^2$ (6, <i>N</i> = 400) = 12.331 <i>p</i> > 0.05 |
|                        | Unemployed <i>n</i> (%)                               | 4 (5.5)   | 3 (4.2)   | 13 (18.1) | 52 (72.2)  |                                                       |
|                        | Not in labor force <i>n</i> (%)                       | 25 (9.1)  | 27 (9.8)  | 62 (22.5) | 162 (58.7) |                                                       |
| Welfare dependent      | Yes <i>n</i> (%)                                      | 27 (9.0)  | 27 (9.0)  | 66 (21.9) | 181 (60.1) | $\chi^2$ (3, <i>N</i> = 400) = 1.824, <i>p</i> > 0.05 |
|                        | No <i>n</i> (%)                                       | 8 (8.1)   | 7 (7.1)   | 28 (28.3) | 56 (56.6)  |                                                       |

<sup>1</sup> Excludes 'other' sex category, <sup>2</sup> Excludes participants with missing data for this variable. Significant results are indicated with bold text

**Table S6.** Pearson Chi-Square Tests of differences in binary household food security by demographic characteristics.

|                                                   |                                          | Household food security | Household food insecurity | Person Chi-Square                                                   |
|---------------------------------------------------|------------------------------------------|-------------------------|---------------------------|---------------------------------------------------------------------|
| <b>Sex <i>n</i> (%)</b>                           | Male                                     | 18 (14.9)               | 103 (85.1)                | $\chi^2$ (1, <i>N</i> = 398 <sup>1</sup> ) = .735, <i>p</i> > 0.05  |
|                                                   | Female                                   | 51 (18.4)               | 226 (81.6)                |                                                                     |
| Aboriginal or Torres Strait Islander <i>n</i> (%) | Yes                                      | 20 (15.0)               | 113 (85.0)                | $\chi^2$ (1, <i>N</i> = 400) = .683, <i>p</i> > 0.05                |
|                                                   | No                                       | 49 (18.4)               | 218 (81.6)                |                                                                     |
| Marital status <i>n</i> (%)                       | Married or defacto                       | 8 (15.4)                | 44 (84.6)                 | $\chi^2$ (1, <i>N</i> = 400) = .146, <i>p</i> > 0.05                |
|                                                   | Single                                   | 61 (17.5)               | 287 (82.5)                |                                                                     |
| Household composition <i>n</i> (%)                | Single adult                             | 19 (17.6)               | 89 (82.4)                 | $\chi^2$ (3, <i>N</i> = 388 <sup>2</sup> ) = 4.383, <i>p</i> > 0.05 |
|                                                   | Two or more adults, no children          | 9 (11.8)                | 67 (88.2)                 |                                                                     |
|                                                   | Single adult, one or more children       | 23 (21.9)               | 82 (78.1)                 |                                                                     |
|                                                   | Two or more adults, one or more children | 23 (23.2)               | 76 (76.8)                 |                                                                     |
| Educational attainment <i>n</i> (%)               | Completed high school                    | 37 (16.3)               | 190 (83.7)                | $\chi^2$ (1, <i>N</i> = 400) = .332, <i>p</i> > 0.05                |
|                                                   | Did not complete high school             | 32 (18.5)               | 141 (81.5)                |                                                                     |
| Labor force status <i>n</i> (%)                   | Employed                                 | 10 (19.2)               | 42 (80.8)                 | $\chi^2$ (2, <i>N</i> = 400) = 3.490, <i>p</i> > 0.05               |
|                                                   | Unemployed                               | 7 (9.7)                 | 65 (90.3)                 |                                                                     |
|                                                   | Not in labor force                       | 52 (18.8)               | 224 (81.2)                |                                                                     |
| Welfare dependent <i>n</i> (%)                    | Yes                                      | 54 (17.9)               | 247 (82.1)                | $\chi^2$ (1, <i>N</i> = 400) = .406, <i>p</i> > 0.05                |
|                                                   | No                                       | 15 (15.2)               | 84 (84.8)                 |                                                                     |

<sup>1</sup> Excludes other' sex category, <sup>2</sup> Excludes participants with missing data for this variable.
